# Supplementary material
Source: bioRxiv or medRxiv preprint supplement (https://www.biorxiv.org/highwire/filestream/122450/field_highwire_adjunct_files/0/405357-1.pdf)
Supplement: Supplementary file [file 405357-1.pdf]

*mmu1*

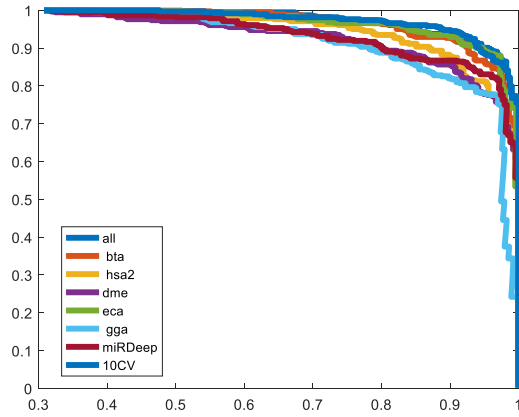

*hsa2*

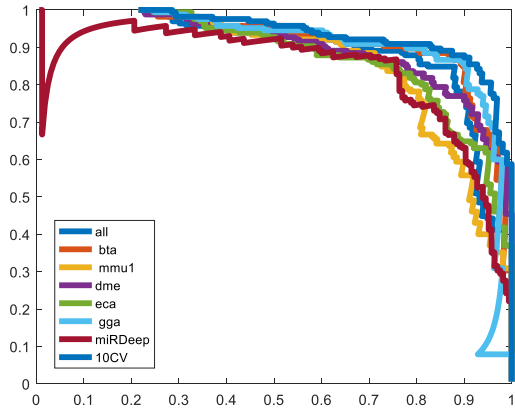

*dme*

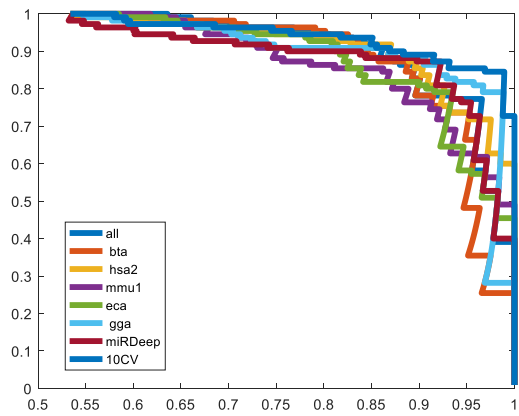

*bta*

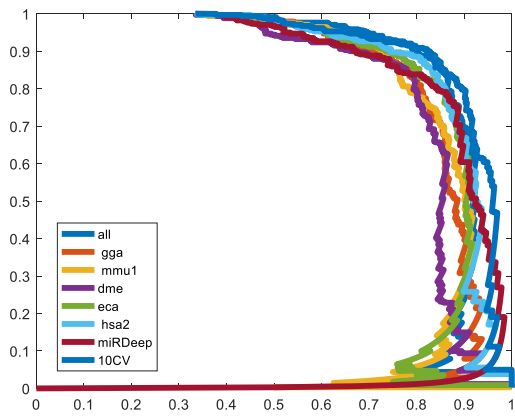

*gga*

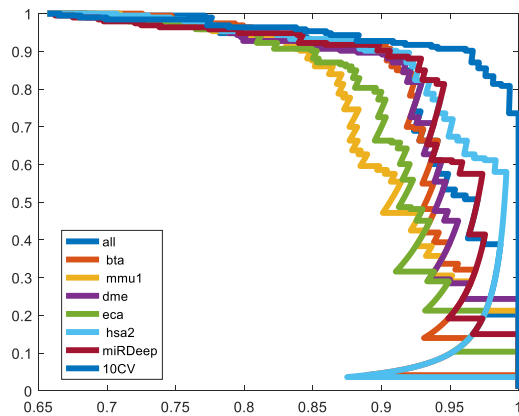

*eca:*

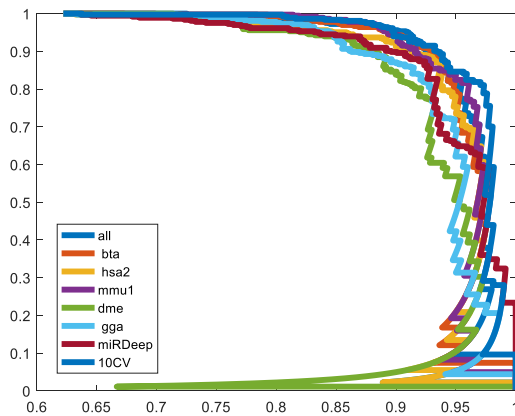

**Supplemental fig 1. Generalization performance of the miPIE classification pipeline over six test species.** MiRDeep method is shown for comparison. 10CV indicates 10-fold cross-validation over test dataset indicated in figure title. All other series represent performance on the hold-out test species where training set is from species indicated in legend; *all* indicates the combination of all datasets other than the test dataset.

Supplemental Table 1. Details of the expression- and sequence-based features selected by the correlation feature selection method for use in the miPIE prediction method.

| <b>Feature</b>      | <b>Description</b>                                                                                                                                                                                                                                                                                                          |
|---------------------|-----------------------------------------------------------------------------------------------------------------------------------------------------------------------------------------------------------------------------------------------------------------------------------------------------------------------------|
| MFE3                | Ratio of normalized minimum free energy value and the number of loops in the pre-miRNA secondary structure.                                                                                                                                                                                                                 |
| dH                  | Enthalpy of the pre-miRNA secondary structure                                                                                                                                                                                                                                                                               |
| Tm                  | Melting energy of the pre-miRNA secondary structure, and melting energy normalized by the loop length of the structure                                                                                                                                                                                                      |
| Tm/loop             |                                                                                                                                                                                                                                                                                                                             |
| SC x zG             | SC is a measurement of change in normalized structural stability when a pre-miRNA sequence is extended or reduced by equal amounts on the 5' and 3' arms. zG is the z-score of the normalized minimum free energy of the pre-miRNA secondary structure. dP is the number of paired bases normalized to the sequence length. |
| SC/(1 - dP)         |                                                                                                                                                                                                                                                                                                                             |
| Probpair2           | Sum of pairing probabilities of short nucleotide motifs                                                                                                                                                                                                                                                                     |
| Probpair3           |                                                                                                                                                                                                                                                                                                                             |
| Probpair7           |                                                                                                                                                                                                                                                                                                                             |
| Probpair9           |                                                                                                                                                                                                                                                                                                                             |
| Probpair19          |                                                                                                                                                                                                                                                                                                                             |
| Probpair94          |                                                                                                                                                                                                                                                                                                                             |
| C((<br>T.((<br>T.(( | Triplet motifs, representing a nucleotide identity and pairing of the 5' neighbor, the nucleotide itself, and the 3' neighbor of the nucleotide                                                                                                                                                                             |
| CG                  | Percentage of nucleotide dimers which contain the given nucleotide motif                                                                                                                                                                                                                                                    |
| GA                  |                                                                                                                                                                                                                                                                                                                             |
| % pb mature         | Percentage of paired bases in mature miRNA sequence                                                                                                                                                                                                                                                                         |
| % reads mature      | Percentage of reads within pre-miRNA sequence which align to mature and miRNA* regions                                                                                                                                                                                                                                      |
| % reads miRNA*      |                                                                                                                                                                                                                                                                                                                             |

**Supplemental Table 2. All novel miPIE predictions above 0.9 threshold (71):**  
*Highlighting indicates sites predicted only by miPIE and not by miRDeep*

| Chromosomal location        | miPIE score | Sequence                                                                                                                   | Secondary structure                                                                                                      |
|-----------------------------|-------------|----------------------------------------------------------------------------------------------------------------------------|--------------------------------------------------------------------------------------------------------------------------|
| chrUn_NT_4762<br>29v1_39857 | 1           | GACCGGGGGGGCGCGCCCGCUUCAAGUAAUCCAG<br>GAUAGGCUGUGCCCCCGGCCUGUCCCGUUA<br>CUUGGGGUGGGACGCGCCAGGCGGCCAUGUGUG<br>GGGGCGGG      | ..(((..(((((((.....))))))))))..<br>)))))))))).....(((.....))..                                                           |
| chrUn_NT_4703<br>75v1_39465 | 1           | CCCGGGGGGGCGCGCCCGCUUCAAGUAAUCCAG<br>GAUAGGCUGUGCCCCCGGCCUGUCCCGUUA<br>UUGGGGUGGGACGCGCCAGGCGGCCAUGUGUG<br>GGGGCGGG        | (((((..(((.....))))))))..<br>)))))))))).....(((.....))..                                                                 |
| chr7_34267                  | 1           | CCGAAGAGGCUGGGCGUGGUUCAAGUAAUCCAG<br>GAUAGGCUGUGGUCUGGCAGUCAGCCUGUUCUAG<br>GUUACUUGGCUCGGAGCCCGCCGACGCUUCGCC<br>CUGGAGAUG  | ..(((..(((.....))))))))..<br>)))))))))).....                                                                             |
| chr2_17954                  | 0.998       | UACAGAAGGCUGUACCCUGGUUCAAGUAAUCCAG<br>GAUAGGCUGUAUCCAUUCCUGCGCCUAUUCU<br>GGUACUUGCACUGGGAGGCAGCCGACUGGUCG<br>AAAUGAGG      | ..(((..(((.....))))))))..<br>)))))))))).....                                                                             |
| chr6_33562                  | 0.998       | AUUUGGCUCGUUUGUCCUUUUCUAUGCAUAUA<br>CUUCUUUGAGAGUUUGAUCUAAAGAGGCAUAGAG<br>CAUGGGAAAUGGGGCGACUGAGGUACUCCGCCA<br>UUCAUUC     | ..(((..(((.....))))))))..<br>)))))))))).....                                                                             |
| chr13_11956                 | 0.996       | AGCAGCUGGGGGCUCUCCAUUGUCUCCAGCCAA<br>GGUGCAGUGCUGAUCUCUGGUCAAUUGGGAGUC<br>UGAGAUAAAGCACUGUAGCUCGGGAAGGGAGGAA<br>CUGUGCCC   | ..(((..(((.....))))))))..<br>)))))))))).....                                                                             |
| chr2_21250                  | 0.996       | CCGCGCCCGAGGAGGAUCCGGUCUCCUGAAGCAA<br>AGUUCUGUGACACUCAGACUCUGGUUACGAUAGC<br>AGUCAGUGCACUACAGAACUUUGUCUCCGGGGG<br>UGCGGCGGG | (((((..(((.....))))))))..<br>)))))))))).....                                                                             |
| chr19_14476                 | 0.996       | GGCUGUACCAUCCUGUCGGAUAGCUUAUCAGACU<br>GAUGUUGACUGUUGGAUCUCAUGGCAACAACAGU<br>CGUAGGCUGUCUGACAUUUUGGUAUCUCUCAUC<br>UGACCGUU  | (((((..(((.....))))))))..<br>)))))))))).....                                                                             |
| chr1_2078                   | 0.996       | CUGUGCUGCCAAUUGGCAUAAACCCGUAAGUCCG<br>AUCUUGUGUUGAAUAGCACUGCACAAGCUCGCUU<br>CUAUGGGUCUGUGUCAGUAUGGUGAUCUGGAAA<br>AGUUUA    | CUGUGCUGCCAAUUGGCAUAAACCCGUAAG<br>AUCCGAUCUUGUGUUGAAUAGCACUGCAC<br>AAGCUCGCUUCUAUGGGUCUGUGUCAGUA<br>UGGUAUCUGGCAAAAGUUUA |
| chrUn_NT_4673<br>19v1_39026 | 0.994       | CCCAACCCUACUAGUGUAUUUUGUGUCCCGCCC<br>CACUAUAUAAAACAGACCCCGUCCCGCCCGGGG<br>UGAGGUAGUAGAUUGUAUAGUUGGGGUCACAC<br>GCCCGGCU     | ..(((..(((.....))))))))..<br>)))))))))).....                                                                             |
| chrUn_NT_4673<br>19v1_39025 | 0.994       | ACCCGUGCCCCCGGGGUGAGGUAGUAGAUU<br>GUAUAGUUGGGGUCACACGCGCCGUCGGAGA<br>UAACUAUACAGUCUACUGUCUCCCGUGGGGGG<br>UGUAUGGCAU        | ..(((..(((.....))))))))..<br>)))))))))).....                                                                             |
| chr12_11207                 | 0.992       | UACAUGCUCUCUGUCAGAGUGAGGUAGUAGAUU<br>GUUAGUUGUAGGGUAGUUUUUACCCUGUUA<br>GGAGAUAAUAUACAUCUAUUGCCUCCCGAG<br>GAGUAAAACA        | ..(((..(((.....))))))))..<br>)))))))))).....                                                                             |
| chr12_11208                 | 0.992       | UAAUACUCGAGAAUGAGACUGUGGUAGCUACU<br>CAGCAAAGAGCUUAGUACAUGCUUCUCUGUCAG<br>AGUGAGGUAGUAGAUUGUAUAGUUGAGGGUAG<br>UUAUUUUACCC   | ..(((..(((.....))))))))..<br>)))))))))).....                                                                             |
| chr24_26206                 | 0.99        | UUGACUGCAUGCAUCCAGGUAGGUAGUAGGUU<br>GUUAGUUUAGAAUACACCAAGGGAGUAACUG<br>UACAACCUCCUAGCUUCCUUGGGUCUUGCACA<br>AGCGGCGUG       | ..(((..(((.....))))))))..<br>)))))))))).....                                                                             |
| chr12_11210                 | 0.99        | GAUGCCUGCACUGUGGGAUGAGGUAGUAGGUU<br>AUAGUUUAGGGUCAUACCCGCAACUGGGAGUA<br>ACUAUACAUCUACUGUCUUCUAAAGCAGCAG<br>AAAUAAC         | (((((..(((.....))))))))..<br>)))))))))).....                                                                             |

|                                       |       |                                                                                                                            |                                                                                             |
|---------------------------------------|-------|----------------------------------------------------------------------------------------------------------------------------|---------------------------------------------------------------------------------------------|
| chr26_26871                           | 0.99  | UGUACUGCUCUGUGGAGGUGAGGUAGUAGGUUGU<br>AUAGUUUGGUGGGAGGGAUUCUGCCAUUUCAG<br>GUGAUAAACUACAGUCUUAUUGCCUCCUAAAG<br>AGCAGCAAUA   | .....(((((((.....(((((((((((((((((((((((<br>(((((((.....)))))))).)))))))).)))))))).<br>.... |
| chr26_26872                           | 0.988 | GUGCAAGAAAUCCUGCUCUCCACAAAGCCAGGG<br>AAUCACACCAGACCUCUGUACUGCUCUGGAGG<br>UGAGGUAGUAGGUUGUAUAGUUUGGUGGGAGGG<br>AUUCUGUCCCA  | (..(((.....(((((((.....(((((((((((((((((((<br>).)))))).)))))).)))))))).)))))))).)..         |
| chr1_1805                             | 0.988 | AGUCUGACUGUCCUUUGGGGUGAGGUAGUAGGUU<br>GUAUAGUUUAGGGUUAUGCCUGCCUGUCAGAU<br>AACUAUACAACUCACUGUCUUUCCUGAAGUGGCU<br>GUGAUAUCA  | ..(((.....(((((((.....(((((((((((((((((((<br>)))))))).)))))))).)))))))).)))))))).           |
| chr1_NT_456233<br>v1_random_1629<br>0 | 0.988 | GUCUGACUGUCCUUUGGGGUGAGGUAGUAGGUUG<br>UAUAGUUUAGGGUUAUGCCUGCCUGUCAGAU<br>ACUAUACAACUCACUGUCUUUCCUGAAGUGGCU<br>UGAUAUCAU    | ((.....(((((((.....(((((((((((((((((((<br>)))))))).)))))))).)))))))).)))))))).              |
| chr24_26204                           | 0.988 | GACCAUGCCUGUUGCCACAAACCCGUAAGUCCG<br>AACUUGUGGUCUAUUCACACAAGCUUGUAUCU<br>AUAGGUAGUGUCUGUCUGGCAAGUGCACAAAGU<br>GUUGUG       | .....(((((((.....(((((((((((((((((((((((<br>..)))))).)))))))).)))))))).)))))))).            |
| chr23_26080                           | 0.988 | UUCGGGGCAGUCAUCGCUGCUGUAAACAUCUUG<br>ACUGGAAGCUGUGAGGUGUCAGCGGGGGCUUCA<br>GUCGGAUGUUACAGCUCGAGGUCGUCGAGUCA<br>CCUGGGUG     | ..(((.....(((((((.....(((((((((((((((((((<br>)))))))).)))))))).)))))))).)))))))).           |
| chr4_32121                            | 0.988 | AUCUUGGCAGUUCACAGCUCUGAGAACUGAAUUC<br>CAUGGACUGGUUCAAUCCAUGCGUUCAGUCCA<br>UGGUAAUCAGUUCUCUAGCUUGGCUGCAUCAAAC<br>UUCACAACUG | .....(((((((.....(((((((((((((((((((((((<br>)))))))).)))))))).)))))))).)))))))).            |
| chr23_26082                           | 0.988 | CCCUACCAUGCUGUAGCAGCUGUAAACAUCUUC<br>ACUCUCAGCUGUGAACUCGAGGUGGGUGGAGAG<br>GAUUGUUUACGCCUUCUGCCAUGGAGUGAACAU<br>UGGUGAGCU   | .....(((((((.....(((((((((((((((((((((((<br>).)))))))).)))))))).)))))))).)))))))).          |
| chr3_29472                            | 0.984 | GAGCUCUGAGUGACAGGUACUGUAAACAUCUUC<br>ACUCUCAGCUGUGGAAACUAAGAAAGCUGGGAGA<br>AGGCUGUUUACUCUCCUGCCUUGGAAUACUCU<br>GGAGGGC     | ((.....(((((((.....(((((((((((((((((((<br>).)))))))).)))))))).)))))))).)))))))).            |
| chr1_7856                             | 0.984 | UAAAUGUGGAAAACUUGUACCCCUUUCUACACAG<br>GUUGGGAUCAGUUGCAAUGCUGUGCGUUUCUGUG<br>GUAUUGCACUUGUCCCGCCUGUUGAGGUUGGUG<br>GGGAUAGAG | .....(((((((.....(((((((((((((((((((((((<br>)))))))).)))))))).)))))))).)))))))).            |
| chr4_31646                            | 0.984 | CCGAAGAUGCCUUGCGCUGGUUCCUCCUGGGUG<br>GGGAUUUGUUGCAUACUUGUAGCUGUGUGUAGA<br>GUAUUGCACUUGUCCCGCCUGUGGAGGAAAGGA<br>GGACUGGUC   | .....(((((((.....(((((((((((((((((((((((<br>)))))))).)))))))).)))))))).)))))))).            |
| chr12_11115                           | 0.984 | CCUCUUGCCUGAUUCCAGGCUGAGGUAGUAGUU<br>GUACAGUUUGAGGUCUAGAUACCACCCGUAAC<br>AGGAGAUAAUCUGUACAGGCCACUGCCUUGCCUGG<br>GACAGAGCUC | .....(((((((.....(((((((((((((((((((((((<br>).)))))))).)))))))).)))))))).)))))))).          |
| chr4_31648                            | 0.982 | AAGAUGCCUUCGGAGAGGUGCUCACAGUCA<br>GUUUUGCAGGUUGCAUCCAGCUGUAGAUACUCU<br>GCUGUGCAAUCCAUGCAAAACUGACUGGGUGG<br>UGGUGAAUAGC     | .....(((((((.....(((((((((((((((((((((((<br>)))))))).)))))))).)))))))).)))))))).            |
| chr1_7858                             | 0.98  | UUUGUUGUAAAUGAACACUGUUCUCUGGUUAG<br>UUUUGCAGGUUGCAUCCAGCUGUAGAUACUCU<br>GCUGUGCAAUCCAUGCAAAACUGACUGGGCAG<br>UGACAAGUCAG    | .....(((((((.....(((((((((((((((((((((((<br>)))))))).)))))))).)))))))).)))))))).            |
| chr1_2082                             | 0.978 | UCAUAUCAGACUUUCCUAGUCCUGAGACCCUA<br>ACUUGUGAGGUUUUGUAGCAACAACACAAGUCA<br>GGCUCUUGGGACCUAGGCGGAGGGGAACACAGCAG<br>CUUUGGAC   | .....(((((((.....(((((((((((((((((((((((<br>).)))))))).)))))))).)))))))).)))))))).          |
| chr24_26208                           | 0.976 | GCUCGUUGCGCCCUUCUCAAUCCUGAGACCCUAA<br>CUUGUGAUGUUAGCUUUAAAUCACGGGUUAG<br>GCUCUUGGGAGCUGUGAGUUGUCUUUGACAUCU<br>UUUUUUU      | .....(((((((.....(((((((((((((((((((((((<br>)))))))).)))))))).)))))))).)))))))).            |
| chr2_23595                            | 0.974 | GAUGUAUAGUAGUCUGUUGCUGUAAACAUCCCCG<br>ACUGGAAGCUGUAGCAGCUUGAGCUUUCAGUCAG                                                   | .....(((((((.....(((((((((((((((((((((((<br>)))))))).)))))))).)))))))).)))))))).            |

|             |       |                                                                                                                             |                                                                                                                              |
|-------------|-------|-----------------------------------------------------------------------------------------------------------------------------|------------------------------------------------------------------------------------------------------------------------------|
|             |       | AUGUUUGCUGCACCUGGCUAUACCUGGACAGCAU<br>CAGGAGGAAAAG                                                                          |                                                                                                                              |
| chrZ_43419  | 0.972 | GCCGGCGCAGAACGAGCCUGGGCUUGGAGCAGUG<br>CUGAGAGGGCUUGGGGAGAGGAUUGUAGUGGAGC<br>UCCAUCCCCAUUCCACUCCUAGCAGCUCUCUGGCC<br>AUCCACC  | ...(((.....(((.....))))))(((.....(((.....(((.....(((.....)))<br>)))))))).)))).)))))))).)))))))).)))))))).)))))))).)))))).... |
| chr13_11953 | 0.972 | GCGGUCGCCGUGCUCUCAGGGUCCAGUUUCCCA<br>GGAAUCCCUUAGGCGCUACGUUGGGGAUUCUGG<br>AAAUACUGUUCUUGGGGCCACGGCUCUGCACCUG<br>GAGACAGCCCG | (((.....(((.....(((.....(((.....(((.....(((.....)))<br>)))))))).)))).)))))))).)))))))).)))))))).))))))....                   |
| chr8_34624  | 0.97  | GAGGGGCCACGAUGACUGACAGGCUGCCUGGCU<br>CAGUUUACACAGUGCUGAUGCUGUCUCUUGUAAA<br>GGUACAGUACUGUAUACUGAAGGAUGGCAGCC<br>AUCUGAGC     | .....(((.....(((.....(((.....(((.....(((.....)))<br>)))))))).)))).)))))))).)))))))).)))))))).))))))....                      |
| chrZ_40851  | 0.97  | GGCAUCAAAACAAUAGACUAUGAACUAUCCUUU<br>UCGGUUAUCAUGGUACCGGUGCUGUAUACGUGAA<br>AGGUACAGUACUGUGUAUACUGAAGAAUGGUGGU<br>GCCAUCACA  | (((.....(((.....(((.....(((.....(((.....(((.....)))<br>)))))))).)))).)))))))).)))))))).)))))))).))))))....                   |
| chr1_7862   | 0.968 | GUUCCAGUAGCUUUCUGCUUUGCAGUCUUCUGUU<br>AGUUUUGCAUAGUUGCACUACAGGAAGAAUGUAG<br>UUGUGCAAUAUCUAGCAAACUGAUGGUGGCCUG<br>UUAUAAUCUA | .....(((.....(((.....(((.....(((.....(((.....)))<br>)))))))).)))).)))))))).)))))))).)))))))).))))))....                      |
| chr27_27144 | 0.968 | AUGCAUCUGUCUUCUAUUGUACCCUGUAGAUC<br>GAAUUUGUGUAAAAGGAAGUUGGGUCACAAAUCG<br>UAUCUAGGGAAUUGUAGUUGACACAAACACUA<br>CAGGUCACAA    | .....(((.....(((.....(((.....(((.....(((.....)))<br>)))))))).)))).)))))))).)))))))).)))))))).))))))....                      |
| chr8_34310  | 0.964 | CGGAGAUCCUGCUCGCGCCAGUGUUCAGAC<br>UACCUGUUCAGGACAAUGCUGUUGUACAGUAGUC<br>UGCACAUUGGUUAGACUGGGCAAGGGAAAGCAGC<br>GACAUGGACU    | .....(((.....(((.....(((.....(((.....(((.....)))<br>)))))))).)))).)))))))).)))))))).)))))))).))))))....                      |
| chr17_13325 | 0.964 | GGCAGGGAGGGGAAGGACUAAUGAGCUGCUGAU<br>GCCGGAGAGCAGACCACAGAGGCUCACUCCGUC<br>UGCCAGUGUUCAGACUACCUGUUCAGGACUACG<br>AGAUUGUACA   | (((.....(((.....(((.....(((.....(((.....(((.....)))<br>)))))))).)))).)))))))).)))))))).)))))))).))))))....                   |
| chr17_13326 | 0.962 | CAGAGGCUCACUCCGUCUGCCAGUGUUCAGAC<br>UACCUGUUCAGGACUACGAGAUUGUACAGUAGUC<br>UGCACAUUGGUUAGGCUUGCUGGGAUACACCAC<br>ACACUGCCAG   | .....(((.....(((.....(((.....(((.....(((.....)))<br>)))))))).)))).)))))))).)))))))).)))))))).))))))....                      |
| chr3_29470  | 0.96  | UGCUGUUGACAGUGAGCGACUGUAAACAUCUCG<br>ACUGGAAGCUGUAGAGCAGCAGAUUGGGGCUUCA<br>GUCGGAUGUUGCAGCUGCCAACUGCCACAGACG<br>UCAAGAAA    | .....(((.....(((.....(((.....(((.....(((.....)))<br>)))))))).)))).)))))))).)))))))).)))))))).))))))....                      |
| chr19_14784 | 0.96  | CCUCUGCCCGCUCUGGCGCCGCGCAGCAGUUCU<br>UCAGUGGCAAGCUUUAUGUCCUUCUCUAGUAGCU<br>AAAGCUGCCAGUUGAAGAACUGUUGAAUGUAGCC<br>ACGUUCAUC  | .....(((.....(((.....(((.....(((.....(((.....)))<br>)))))))).)))).)))))))).)))))))).)))))))).))))))....                      |
| chr12_10416 | 0.96  | CUCUGCAGCGCCGGCACGGGAACGGAUCCCAA<br>AAGCAGCUGUCCCCGACGCGCCAGCUGCCUGGG<br>AUUUCGUUACCCGCGCCUCCGCCUCAGCCGCCGCC<br>GCUACGC     | .....(((.....(((.....(((.....(((.....(((.....)))<br>)))))))).)))).)))))))).)))))))).)))))))).))))))....                      |
| chr1_7859   | 0.958 | AUGACAGCUCUUGUAGCACUAAAGUGCUUUAUGU<br>GCAGGUAGUGUACUAAUCUACUGCAUUAUAAAG<br>CACUUAAGUACUGCUAGCUGUAGAUCUACAUAU<br>UCAGCAUGUU  | .....(((.....(((.....(((.....(((.....(((.....)))<br>)))))))).)))).)))))))).)))))))).)))))))).))))))....                      |
| chr1_936    | 0.95  | CCGGGUGCGCCAGGCCUGGCUAGGUAGUAGUUU<br>GUGCUGUUGGUCGGGUUGUGACAUUGCCCGCUGU<br>GGAGAUAAACUGCGCAAGCUACUGCCUUGCUAGUG<br>CUGGUGAUG | .....(((.....(((.....(((.....(((.....(((.....)))<br>)))))))).)))).)))))))).)))))))).)))))))).))))))....                      |
| chr2_23593  | 0.95  | UUAAGCUAACUUUAGUUCUGUAAACAUCUAC<br>ACUCAGCUAUAACAAGUGGUAGGGCUGGGGGGUG<br>GAUGUUUACUUAACUGACUUGGAAAGGCAGCUU<br>UCCUGAAUGA    | .....(((.....(((.....(((.....(((.....(((.....)))<br>)))))))).)))).)))))))).)))))))).)))))))).))))))....                      |
| chrZ_41523  | 0.948 | CUGCACAGCUUUCUUUAAUGUUGGUCUGUUUG<br>GGUUCUGGCAUGAUGAUUUGUGAGUUUAGAUUA<br>AAAUCACAUUGCCAGGGAUUAACCAUAGCCAUG<br>ACCGCA        | .....(((.....(((.....(((.....(((.....(((.....)))<br>)))))))).)))).)))))))).)))))))).)))))))).))))))....                      |

|             |       |                                                                                                                               |                                                                                               |
|-------------|-------|-------------------------------------------------------------------------------------------------------------------------------|-----------------------------------------------------------------------------------------------|
| chr33_30699 | 0.948 | GGGUGCCACCCACCCUGGCAGCGCCCGGGCCGAG<br>GUUCUGUCCUACACUCCGGCUGUGGCUAUGGGCA<br>GUCAGUGCAUCACAGAACUUGGUCGCCGGGAGCUC<br>AGCAG      | (((.....)))..(((.....(((.....(((.....(((.....)))<br>)))))).....))))))))))))))))))..))..       |
| chr2_18747  | 0.946 | GGGAGCAGUUCACAGGAAGUCCAGCUGGAAAGG<br>GGGGCCGUUACACUGUAAGAGAGUGAGUAGCAGG<br>UCUCACAGUGAACCGGUCUCUUUUCUGCUGUGU<br>CAUGCC        | (((.....)))<br>))...(((.....(((.....(((.....(((.....)))<br>)...)))))))))))))))))))))))))))))) |
| chr7_34091  | 0.946 | CAUAUUGGGAUGGCCUGACUUUGAGCUGUUGAAU<br>UCGGGGCCGUAAACACUGUCUGAGAGGUUUAUAU<br>UCUCACAGUGAACCGGUCUCUUUUCAGCUGCUU<br>CCUGGC       | .....(((.....(((.....(((.....(((.....(((.....)))<br>))))))))))))))))))))))))))))))            |
| chr20_24659 | 0.944 | CACCUUUGAGGGAGCGGCAGUUAAGACUUGUAGU<br>GAUGUUUAGAUAAUGUAUACAUGAACAUACAU<br>UAAGUCUGUGCUACUUCUCUCCUCAUUCUUGUCG<br>GCGGGAAAG     | ..(((.....(((.....(((.....(((.....(((.....)))<br>)...))))))))))))))))))))))))))))))           |
| chr4_32054  | 0.942 | UUCUCUGGAC AUGACUGUAUCUCUGUGCUUCAG<br>CUUCUUUACAGUGCGCCUUGUUGCGUUCAGUC<br>AAGCAGCAUUGUACAGGGCUAUGAAAGAACAGAG<br>GCAUGCUCUU    | .....(((.....(((.....(((.....(((.....(((.....)))<br>))))))))))))))))))))))))))))))            |
| chr13_11753 | 0.94  | GAAGAUGAAAAGAACAUCUGUCUUGCGCCUUCG<br>GCUUCUUUACAGUGCGCCUUGUUGCAUAUGGAU<br>CAAGCAGCAUUGUACAGGGCUAUGAAGGCACUGA<br>GUCUUCUCU     | (((.....(((.....)))..(((.....(((.....(((.....(((.....)))<br>))))))))))))))))))))))))))))))    |
| chr4_31644  | 0.94  | CACGGUAAGCUUUGUUUUGCUGUUGCGGGUGGA<br>UCACGAUGCAAUUUUGAUUAGUUAGUAGGAGAA<br>AAAUUGCACGGUAUCCAUCUGUAAACC GCAGAC<br>CUUCAUC       | ...(((.....(((.....(((.....(((.....(((.....)))<br>))))))))))))))))))))))))))))))              |
| chr28_28209 | 0.938 | CUCUGUGGUCUGGCUCUGUGUGGAAGACUAGUGA<br>UUUUGUUUUUAGAUUUUAAAAGGUGACAACAAA<br>UCAUAGCCUGCCAUCACAGCACAGAUCUUCACCU<br>UGCUGUAAGGAA | ..(((.....(((.....(((.....(((.....(((.....)))<br>))))))))))))))))))))))))))))))               |
| chrZ_45173  | 0.936 | GAUGUUGGUCUAGUUCUGUGUGGAAGACUAGUGA<br>UUUUGUUUUUAGAUAAUUAUUUGACAACAA<br>AUCACAGUCUGCCAUAUGGCACAGAUAUGCCUC<br>UACAGGACAAGU     | (((.....(((.....(((.....(((.....(((.....)))<br>))))))))))))))))))))))))))))))                 |
| chr10_9089  | 0.936 | AGGACGGCCGCGGUGCCUCUGGAAGACUAGUGA<br>UUUUGUUUUUAGUUGGCUAUCCACCACAACAA<br>GUCACAGUCUGCCUAGGGCGCACGGCCCGCCGG<br>CGCUGCAGGAG     | ..(((.....(((.....(((.....(((.....(((.....)))<br>))))))))))))))))))))))))))))))               |
| chr2_23337  | 0.934 | UCUGCUUGCUCUGGUGGAGAUUUGCACAUAUCU<br>AAGUUGCAUGUUGCAGCGCCUCAGUGCAAUUUA<br>GUGUGUGCGAUACUUCACAUGAGUGCAUGCACA<br>CGGGUAUGG      | ..(((.....(((.....(((.....(((.....(((.....)))<br>))))))))))))))))))))))))))))))               |
| chr2_19127  | 0.932 | GGGUUCACACACUCUCAGCUUCCUGGGAUGG<br>AGUUGUCCUUGUGCUGGACAGCAGAGAGGAGCA<br>AAGCAUACUGACACUCCACAGGCAGCCAGUGGAG<br>AUGAAAUCAUUA    | (((.....(((.....(((.....(((.....(((.....)))<br>))))))))))))))))))))))))))))))                 |
| chr1_7865   | 0.93  | GGUUGGUCAGAGUAAUGUCAAAAGUGCUUACAGU<br>GCAGGUAGUGAUAAUAGAACCUACUGCAGUGAA<br>GGCACUUGUAGCAUUAUGUUGACAGCUGCCUCAG<br>GAGAUCUUGC   | (((.....(((.....(((.....(((.....(((.....)))<br>))))))))))))))))))))))))))))))                 |
| chrZ_41525  | 0.928 | UGAGACGGAGACCUCUCUGGUGAGGUGCAGAGCU<br>UAGCUGAUUGGUGAACAGUGAUUGUUUCCUCUU<br>UGUUCACAGUGGCUAAGUUCUGCACCUAAGAGA<br>AGGUGA        | .....(((.....(((.....(((.....(((.....(((.....)))<br>))))))))))))))))))))))))))))))            |
| chr1_2080   | 0.928 | GAAGCUGUGUCAUCCGGGUUGAGGUAGUAGGU<br>GUAUGGUUUAGAGUACACCCUGGGAGUUAAUCUG<br>UACAACCUUCUAGCUUUCUUGGAGCACACUUGA<br>GCCAUCGAG      | (((.....(((.....(((.....(((.....(((.....)))<br>))))))))))))))))))))))))))))))                 |
| chr9_35428  | 0.928 | CGGGGGUGGUGGCGGGACGCUCACGAGCGUGCGG<br>AUGAUUUGGCGGCACAGUGGGCAGUUGUUCUGU<br>CGGCGGCCAGCGCUAAUGCAGCGCCUGCAGAA<br>GGUGUGCCUGCA   | ..(((.....(((.....(((.....(((.....)))<br>))))))))))))))))))))))))))))))                       |
| chr1_485    | 0.916 | CUUGCAGAUCUCAGUAACCCUUUAGAGGAUGAC<br>UGAUUCUUUUGGUGUUCAGAGUCAAUAAUAUU<br>UCUAGCACCAUUUGAAAUCGGUUAUAGUGAUUGG                   | .....(((.....(((.....(((.....(((.....)))<br>))))))))))))))))))))))))))))))                    |

|                             |       | GGAAUUG                                                                                                                         |                                                                                           |
|-----------------------------|-------|---------------------------------------------------------------------------------------------------------------------------------|-------------------------------------------------------------------------------------------|
| chr26_26882                 | 0.916 | CUGAGCCAGAAAAUGUCUCUACACAGGCUGAC<br>CGAUUUCUCUUGGUGUUCAGAGUCUCAGUUUCUG<br>UCUAGCACCAUUUGAAAUCGGUUAUGAUGUAGGG<br>GGAAAAGCA       | .....((((((((((.....((((((((.....((((((((.....)))))))).<br>)))))).....))))))))).....      |
| chr9_36157                  | 0.914 | UUGCCCUACUUGUUCGCCCUAGCAGCACGUAAA<br>UAUUGGUGUAGUAAAAUAAACCUAAACCCCAAU<br>AUUAUUGUGUCUCUUAAGCGUGGCAGAGAUUCAG<br>CAACUUGUU       | (((.....((((((.....((((((((.....((((((((.....)))))))).<br>))).....))))))))).....          |
| chr9_36158                  | 0.908 | AUUUUUCUGUUAAUGAAUCUGUGCUCUGACAUG<br>UGGAUGAAUAGAAGAGUUGCCCUACUUGUUCGC<br>CCUAGCAGCACGUAAAAUUGGUGUAGUAAAAUA<br>AACCUUAAA        | (((.....((((((((.....((((((((.....((((((((.....)))))))).<br>)))))).....))))))))).....     |
| chr1_8055                   | 0.904 | UGCUGAUGUCUGUCAUACUCUAGCAGCACGUAAA<br>UAUUGGUGUAAAAACUGUAAAAUAUCUCCAGUAUU<br>AACUGUGCUCUGAAGUAAGGCUAGCCACUUCUG<br>CAUGUGAGU     | (((.....((((((((.....((((((((.....((((((((.....)))))))).<br>)))))).....))))))))).....     |
| chr9_36159                  | 0.904 | GUGAGGCCUAAAAGUACUCUAGCAGCACAUCAUG<br>GUUUGCAUGCUGUAGUGAAGAUGCGAAUCAUUAU<br>UUGCUGCUUAGAAAAUUAAAGGAAGAUAAACAGU<br>UGAAGACA      | .....((((((((((.....((((((((.....((((((((.....)))))))).<br>)))))).....))))))))).....      |
| chrUn_NT_4650<br>61v1_38058 | 0.9   | ACUGCACACUGGGGCCUACAUUCCUGAGUGACC<br>UGCAGGGUCUGGCGCUGGGUCAGGGAAUGACCCA<br>CAUACCAAGGUCUGGGUGCUCUCAGCUGAUGGCA<br>GGGGUAAACCAUCC | .....((((((((((.....((((((((.....((((((((.....)))))))).<br>.....)))))).....)))))))))..... |

**Supplemental Table 3.** miRDeep predictions at score level 9 or 10 (46):

| Chromosomal location                  | miRDeep2 score | Precursor sequence                                                                                                          | Secondary structure |
|---------------------------------------|----------------|-----------------------------------------------------------------------------------------------------------------------------|---------------------|
| chr19_14476                           | 2.4e+4         | GGCUGUACCAUCCUGUCGGAUAGCUUAUCAGACUGAU<br>GUUGACUGUUGGAUCUCAUGGCAACAACAGUCGGUAG<br>GCUGUCUGACAUUUUGGUUAUCUCUCAUCUGACCGUU     | ((.....)).....      |
| chr1_2078                             | 2.1e+4         | CUGUGCUGCCAAUUGGCAUAAAACCCGUAGAUCCGAUC<br>UUGUGUUGAAAUGCACUGCACAAAGCUCGCUUCAUGG<br>GUCUGUGUCAGUAUGGUGAUCUGGCAAAAAGUUUA      | .....)).....        |
| chr13_11956                           | 2.0e+4         | AGCAGCUGGGGGCUCUCCAUGUCUCCAGCCAAAGG<br>UGCAGUCUGCAUCUCUGGUCAAUUGGGAGUCUGAGA<br>UGAAGCACUGUAGCUCGGGAAGGAGGAACUGUGCCC         | .....)).....        |
| chr6_33562                            | 1.9e+4         | AUUUGGCUCGUUUUCCUUUUUCUAUGCAUAUACUU<br>CUUUGAGAGUUUGAUCUAAAAGAGGCAUAGAGCAUGG<br>GAAAAUGGGGCGACUGAGGUACUCCGCCAUUCAUUC        | .....)).....        |
| chr7_34267                            | 1.8e+4         | CCGAAGAGGCUGGGCGUGGGUUAAGUAAUCCAGGAU<br>AGGCUGUGGUCUGGCAGUCAGCCUGUUCUAGGUUACU<br>UGGCUCGGAGCCCGCCGACGCUUCGCCUGGAGAU<br>G    | .....)).....        |
| chr2_17954                            | 1.8e+4         | UACAGAAGGCUGUCACCUGGUUCAAGUAAUCCAGGAU<br>AGGCUGUAUCCAUCCUGCGCCUUAUUCUUGGUUAC<br>UUGCACUGGGAGCCGACGCCAGUCGCAAAUAGG           | .....)).....        |
| chr1_NT_456233<br>v1_random_1629<br>0 | 1.4e+4         | GUCUGACUGUCCUUUGGGUGAGGUAGUAGGUUGUA<br>UAGUUUAGGGUUAUGCCCUGCCUGUCAGAUAAUAU<br>ACAAUCUACUGUCUUCCUGAAGUGGCUGUGAUUCA<br>U      | .....)).....        |
| chr1_1805                             | 1.4e+4         | AGUCUGACUGUCCUUUGGGUGAGGUAGUAGGUUGU<br>AUAGUUUAGGGUUAUGCCCUGCCUGUCAGAUAAUA<br>UACAAUCUACUGUCUUCCUGAAGUGGCUGUGAUUCA<br>A     | .....)).....        |
| chr12_11210                           | 1.4e+4         | GAUGCCUGCACUGUGGAUGAGGUAGUAGGUUGUAU<br>AGUUUAGGGUCAUACCCGCACUGGGAGAUAAUAU<br>ACAAUCUACUGUCUUCCUAAAAGCAGCAGAAAUCA<br>C       | .....)).....        |
| chr26_26871                           | 1.4e+4         | UGUACUGCUCUGUGGAGGUGAGGUAGUAGGUUGUAU<br>AGUUUGGUGGGAGGGAUUCUGUCCAUUUCAGGUGA<br>UAACUAUACAGUCUAUUGCCUCCUAAAAGAGCAGCA<br>AUA  | .....)).....        |
| chr24_26206                           | 1.4e+4         | UUGACUGCAUGCAUCCAGGUUGAGGUAGUAGGUUGU<br>AUAGUUUAGAAUACACCAAGGGAGAUAAUCUGUACA<br>ACCUCCUAGCUUCCUUGGGUCUUGCACAAAAGCGGCG<br>UG | .....)).....        |
| chrUn_NT_4673<br>19v1_39025           | 1.3e+4         | ACCCCGUGCCCCCCCCGGGUGAGGUAGUAGAUUGUA<br>UAGUUGGGGUCACACGCCCGCUCGGAGAUAAUAU<br>UACAGUCUACUGUCUCCUGUGGGGGGUGUAUGGCA<br>U      | .....)).....        |
| chr12_11207                           | 1.3e+4         | UACAUGCUUCUCUGUCAGAGUGAGGUAGUAGAUUGU<br>AUAGUUGUAGGGUAGUUAUUUACCCUGUUCAGGAG<br>AUAACUAUACAAUCUAUUGCCUCCUGAGGAGUAAA<br>ACA   | .....)).....        |
| chr2_21250                            | 1.2e+4         | CCGCGCCGAGGAGGAUCCGGUCUCCUGAAGCAAAGU<br>UCUGUGACACUCAGACUCUGGUUACGAUAGCAGUCAG<br>UGCACUACAGAACUUUGUCUCCGGGGGUCGCGCGGC<br>G  | .....)).....        |
| chr23_26080                           | 1.0e+4         | UUCGGGGCAGUCAUCGUCUGUAACAUCUUGACU<br>GGAAGCUGUGAGGUGUCAGCGGGGCUUCAGUCGGA<br>UGUUUACAGCUGCAGGCUCGUCAGUCACCUGGGUG             | .....)).....        |





|             |        |                                                                                                                               |                                                                       |
|-------------|--------|-------------------------------------------------------------------------------------------------------------------------------|-----------------------------------------------------------------------|
|             |        | UA                                                                                                                            |                                                                       |
| chr12_10416 | 3.3e+3 | CUCUGCAGCGCCGGCACGGGCAACGGAAUCCAAAAG<br>CAGCUGUCCCCGCAGCGCCAGCUGCCUGGGAAUUC<br>GUUACCCGCGCCUCCGCCUCAGCCGCCGCCGCUACGC          | ....((((((((((((.....)))))))))..)))<br>)))))))).((.....))..)))))).... |
| chr7_34091  | 2.6e+3 | CAUUAUGGGAUGGCCUGACUUUGAGCUGUUGAAUUCG<br>GGGCCGUAACACUGUCUGAGAGGUUUAUUAUUCAC<br>AGUGAACCGGUCUCUUUUUCAGCUGCUUCCUGGC            | .....(((.....(((.....))))))..)))<br>)))))))).((.....))..))))))....    |
| chr19_14784 | 2.5e+3 | CCUCUGCCCGCUCUCCUGGCUGCCCGGCAGCAGUUCUUC<br>AGUGGCAAGCUUUUGUCCUUCUCUAGUAGCUAAAGC<br>UGCCAGUUGAAGAACUGUUGAAUGUAGCCACGUUCAU<br>C | .....(((.....(((.....))))))..)))<br>)))))))).((.....))..))))))....    |
| chr1_936    | 2.5e+3 | CCGGGUGCGCCAGGCCUGGCUGAGGUAGUAGUUUGUG<br>CUGUUGGUCGGGUUGUGACAUUGCCCGCUGUGGAGAU<br>AACUGCGCAAGCUACUGCCUUGCUAGUCUGGUGAUG        | .....(((.....(((.....))))))..)))<br>)))))))).((.....))..))))))....    |
| chr2_18747  | 2.5e+3 | GGGAGCAGUUCACAGGAAUGUCCAGCUGGAAGGGGG<br>GCCGUUACACUGUAAGAGAGUAGUAGCAGGUCUCAC<br>AGUGAACCGGUCUCUUUUCUGCUGUGUCAUGCC             | (((.....)))..(((.....))))..)))<br>)))))))).((.....))..))))))....      |
| chr1_8055   | 2.4e+3 | UGCUGAUGUCUGUCAUACUCUAGCAGCACGUAAAUAU<br>UGGUGUUAAAACUGUAAAUAUCUCCAGUAUUAACUG<br>UGCUGCUAAGUAAGGCUAGCCACUUCUGCAUGUGAG<br>U    | (((.....)))..(((.....))))..)))<br>)))))))).((.....))..))))))....      |
| chr4_32054  | 2.4e+3 | UUCUCUGGACAUGACUGUAUCUCUGUGCUUUCAGCUU<br>CUUUACAGUGCUGCCUUGUUGCGUUAUGUCAAGCAG<br>CAUUGUACAGGGCUAUGAAAGAACAGAGGCAUGCUCU<br>U   | .....(((.....(((.....))))))..)))<br>)))))))).((.....))..))))))....    |
| chrZ_45173  | 2.4e+3 | GAUGUUGGUCUAGUUCUGUGUGGAAGACUAGUGAUU<br>UUGUUGUUUUAGAUAAUUAUUUGACAACAAUUA<br>CAGUCUGCCAU AUGGCACAGAUC AUGCCUCUACAGGA<br>CAAGU | ((.....))..(((.....))))..)))<br>)))))))).((.....))..))))))....        |
| chr28_28209 | 2.2e+3 | CUCUGUGGUCUGGCUCUGUGUGGAAGACUAGUGAUUU<br>UGUUGUUAUGAUUUUAAAAGGUGACAACAAUUAUA<br>GCCUGCCAUACAGCACAGAUCUUCACCCUUGCUGGUA<br>GGAA | ..(((.....)))..(((.....))))..)))<br>)))))))).((.....))..))))))....    |
| chr33_30699 | 2.1e+3 | GGGUGCCCACCCACCCUGGCAGCGCCGGCCGAGGU<br>UCUGUCCUACACUCCGGCUGUGGCUAUGGGCAGUCAG<br>UGCAUCACAGAACUUGGUCCGGGAGCUCAGCAG             | (((.....)))..(((.....))))..)))<br>)))))))).((.....))..))))))....      |
| chr2_23593  | 2.1e+3 | UUAAGCUAACUUUAGUCCUGUAAAACUCCUACACU<br>CAGCUAUAACAAGUGGUAGGGCUGGGGGUGGAUGU<br>UUACUUAACUGACUUGGAAAGGAGCUUUCUGAAU<br>GA        | .....(((.....(((.....))))))..)))<br>)))))))).((.....))..))))))....    |
| chr5_32451  | 1.9e+3 | CCCGCCCGCGCCUCCUCAGCCUCCUUGGUGCAGUGG<br>UUCUUAACAGUUAACAGUUCUCUAUCAUAAUUGUGA<br>AAUGUUUAGGACCACUUGACCAGCGAGGCCCGGCAU<br>C     | ..(((.....)))..(((.....))))..)))<br>)))))))).((.....))..))))))....    |
| chrZ_41525  | 1.7e+3 | UGAGACGGAGACCUCUCUGGUGAGGUGCAGAGCUUAG<br>CUGAUUGGUGAACAGUGAUUGUUUCCUCUUGUUA<br>CAGUGGCUAAGUUCUGCACCUGAAGAGAAGGUGA             | .....(((.....(((.....))))))..)))<br>)))))))).((.....))..))))))....    |
| chrZ_47473  | 1.5e+3 | UUCAUGCAGAGCUGGAGGGGAGGCAAGAUGUUGGCA<br>UAGCUGUUAACCUAAAACUGCUAUGCCAACAUUU<br>GUCAUCUUCCUGUCUGUUUGCGUCAGAGACAGAUUC<br>UAA     | .....(((.....(((.....))))))..)))<br>)))))))).((.....))..))))))....    |
| chr20_24659 | 1.4e+3 | CACCUUUGAGGGAGCGGCAGUUAAGACUUGUAGUGAU<br>GUUUAAGAUAAUGUAUUAACAUGAACACUUAAGU<br>CUGUGCUACUUCUCUCCUCAUUCUUGUCGGCGGAAG<br>G      | ..(((.....)))..(((.....))))..)))<br>)))))))).((.....))..))))))....    |

**Supplemental Table 4.** miPIE unique predictions above 90% threshold (27 of 71):

| <b>Chromosomal location</b> | <b>miPIE score</b> |
|-----------------------------|--------------------|
| chrUn_NT_476229v1_39857     | 1                  |
| chrUn_NT_470375v1_39465     | 1                  |
| chrUn_NT_467319v1_39026     | 0.994              |
| chr12_11208                 | 0.992              |
| chr26_26872                 | 0.988              |
| chr24_26204                 | 0.988              |
| chr4_31646                  | 0.984              |
| chrZ_43419                  | 0.972              |
| chr8_34624                  | 0.97               |
| chrZ_40851                  | 0.97               |
| chr17_13325                 | 0.964              |
| chr1_7859                   | 0.958              |
| chrZ_41523                  | 0.948              |
| chr13_11753                 | 0.94               |
| chr4_31644                  | 0.94               |
| chr10_9089                  | 0.936              |
| chr2_23337                  | 0.934              |
| chr2_19127                  | 0.932              |
| chr1_7865                   | 0.93               |
| chr1_2080                   | 0.928              |
| chr9_35428                  | 0.928              |
| chr1_485                    | 0.916              |
| chr26_26882                 | 0.916              |
| chr9_36157                  | 0.914              |
| chr9_36158                  | 0.908              |
| chr9_36159                  | 0.904              |
| chrUn_NT_465061v1_38058     | 0.9                |

**Supplemental Table 5.** miRDeep2 unique predictions above 90% threshold (2 of 46):

| <b>Chromosomal location</b> | <b>miRDeep2 score</b> |
|-----------------------------|-----------------------|
| chr5_32451                  | 1.9e+3                |
| chrZ_47473                  | 1.5e+3                |

**Supplemental Table 6.** Novel sites predicted above decision threshold by both miRDeep2 and miPIE (44):

| <b>Chromosomal location</b>   | <b>miPIE score</b> | <b>miRDeep2 score</b> |
|-------------------------------|--------------------|-----------------------|
| chr7_34267                    | 1                  | 1.8e+4                |
| chr2_17954                    | 0.998              | 1.8e+4                |
| chr6_33562                    | 0.998              | 1.9e+4                |
| chr13_11956                   | 0.996              | 2.0e+4                |
| chr2_21250                    | 0.996              | 1.2e+4                |
| chr19_14476                   | 0.996              | 2.4e+4                |
| chr1_2078                     | 0.996              | 2.1e+4                |
| chrUn_NT_467319v1_39025       | 0.994              | 1.3e+4                |
| chr12_11207                   | 0.992              | 1.3e+4                |
| chr24_26206                   | 0.99               | 1.4e+4                |
| chr12_11210                   | 0.99               | 1.4e+4                |
| chr26_26871                   | 0.99               | 1.4e+4                |
| chr1_1805                     | 0.988              | 1.4e+4                |
| chr1_NT_456233v1_random_16290 | 0.988              | 1.4e+4                |
| chr23_26080                   | 0.988              | 1.0e+4                |
| chr4_32121                    | 0.988              | 1.0e+4                |
| chr23_26082                   | 0.988              | 9.8e+3                |
| chr3_29472                    | 0.984              | 9.6e+3                |
| chr1_7856                     | 0.984              | 6.8e+3                |
| chr12_11115                   | 0.984              | 5.8e+3                |
| chr4_31648                    | 0.982              | 6.3e+3                |
| chr1_7858                     | 0.98               | 6.3e+3                |
| chr1_2082                     | 0.978              | 8.3e+3                |
| chr24_26208                   | 0.976              | 8.3e+3                |
| chr2_23595                    | 0.974              | 7.0e+3                |
| chr13_11953                   | 0.972              | 6.9e+3                |
| chr1_7862                     | 0.968              | 3.8e+3                |
| chr27_27144                   | 0.968              | 4.2e+3                |
| chr8_34310                    | 0.964              | 6.5e+3                |
| chr17_13326                   | 0.962              | 6.5e+3                |
| chr3_29470                    | 0.96               | 4.5e+3                |
| chr19_14784                   | 0.96               | 2.5e+3                |
| chr12_10416                   | 0.96               | 3.3e+3                |
| chr1_936                      | 0.95               | 2.5e+3                |
| chr2_23593                    | 0.95               | 2.1e+3                |
| chr33_30699                   | 0.948              | 2.1e+3                |
| chr2_18747                    | 0.946              | 2.5e+3                |
| chr7_34091                    | 0.946              | 2.6e+3                |

|             |       |        |
|-------------|-------|--------|
| chr20_24659 | 0.944 | 1.4e+3 |
| chr4_32054  | 0.942 | 2.4e+3 |
| chr28_28209 | 0.938 | 2.2e+3 |
| chrZ_45173  | 0.936 | 2.4e+3 |
| chrZ_41525  | 0.928 | 1.7e+3 |
| chr1_8055   | 0.904 | 2.4e+3 |

**Supplemental Table 7. Novel microRNA predictions by miPIE at different precision thresholds on the 6 test species**

|           | All microRNA predictions | Above 80% threshold | Above 90% threshold | Above 95% threshold |
|-----------|--------------------------|---------------------|---------------------|---------------------|
| Chicken   | 186                      | 106                 | 71                  | 47                  |
| Horse     | 400                      | 265                 | 192                 | 143                 |
| Cow       | 331                      | 147                 | 105                 | 74                  |
| Mouse     | 382                      | 252                 | 198                 | 150                 |
| Human     | 181                      | 81                  | 54                  | 43                  |
| Fruit-fly | 98                       | 50                  | 36                  | 24                  |
